# Supplementary material
Source: Springer Nature journal article supplement (https://www.springermedizin.de/resource/supplementary/12913_2014_3533_MOESM3_ESM.pdf/9533072)

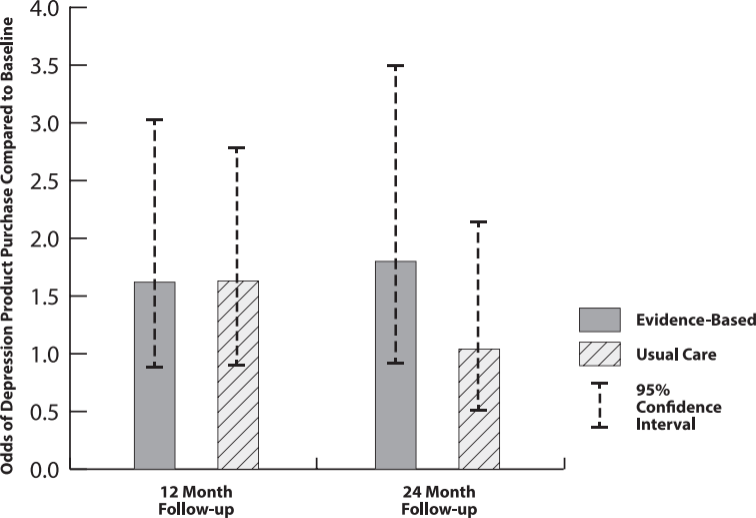

\*adjusted for covariates as described in text

Supplement: MOESM3 [file 9533072]
